# Supplementary material for: Screening for Right Ventricular Dysfunction in the Emergency Department Using a Smartphone ECG Analysis Application: An External Validation Study with Acute Pulmonary Embolism Patients
Source: bioRxiv or medRxiv preprint supplement (doi:10.1101/2024.05.08.24307018), 2024-05-09

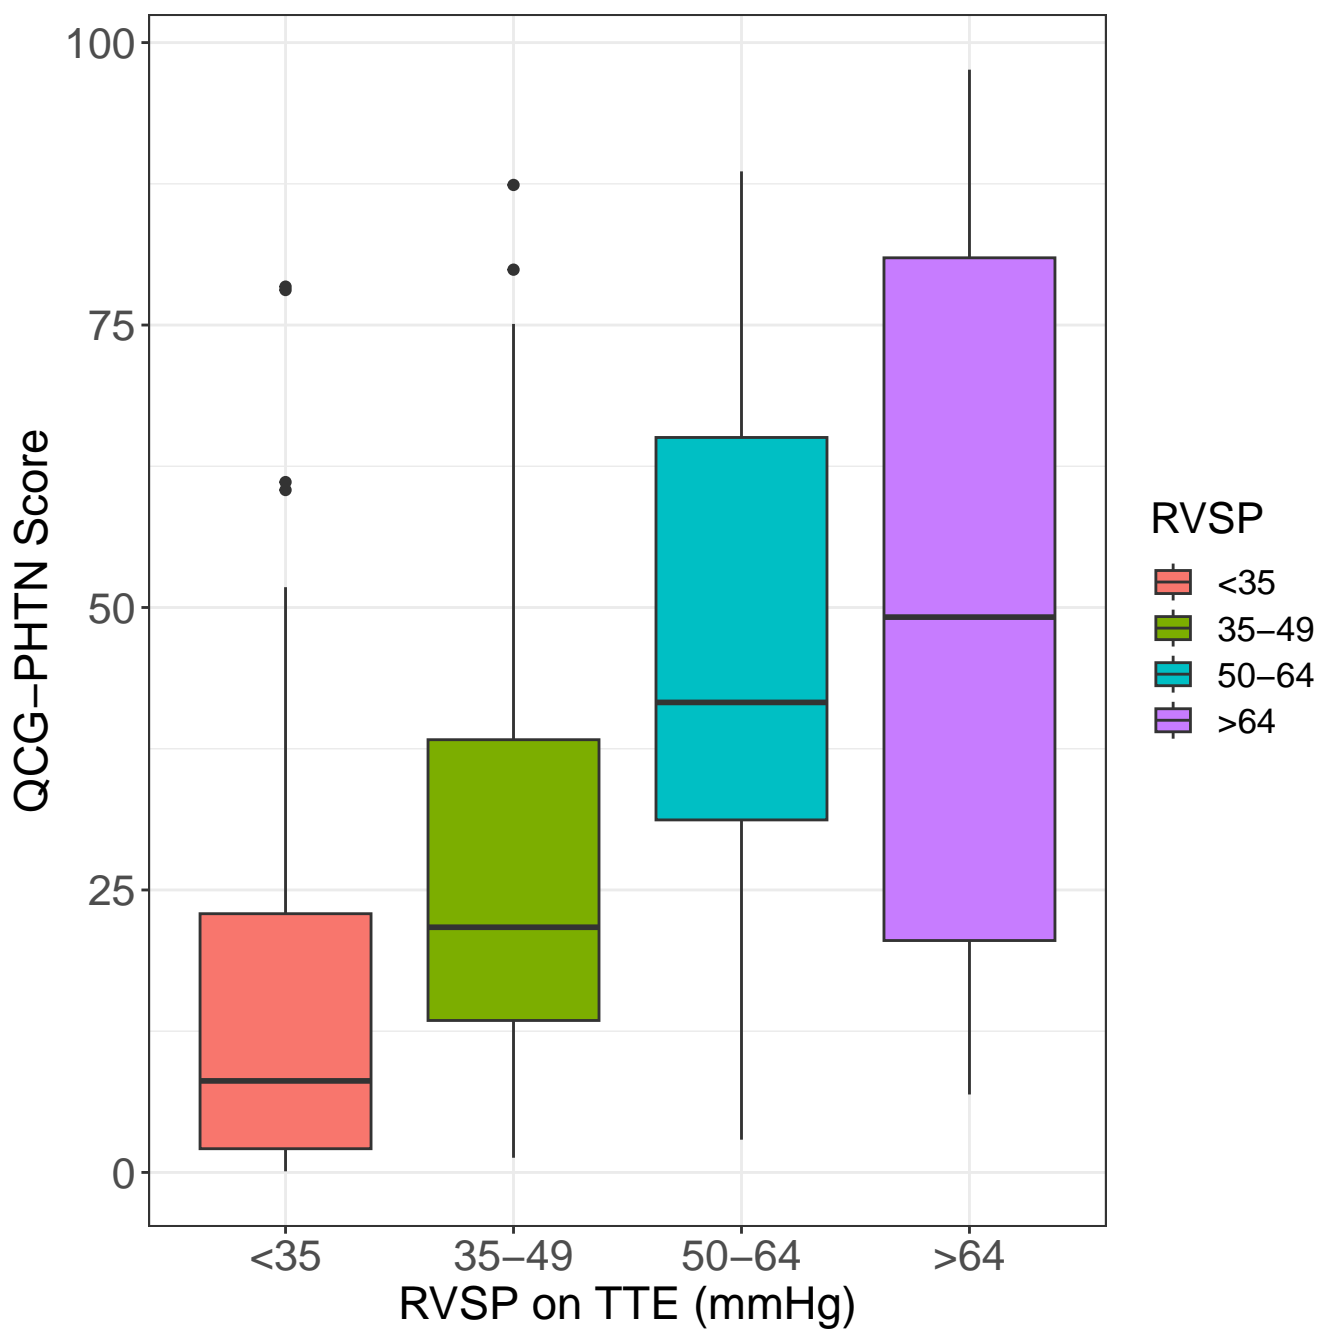

Supplement: Supplementary file [file media-1.pdf]
